# Supplementary material for: Global MicroRNAs Expression Profile Analysis Reveals Possible Regulatory Mechanisms of Brain Injury Induced by Toxoplasma gondii Infection
Source: Front Neurosci. 2022 Mar 10;16:827570. doi: 10.3389/fnins.2022.827570 (PMC8961362; doi:10.3389/fnins.2022.827570)
Supplement: Supplementary Table 6 — GO terms significantly enriched by target genes of DEMs from the samples at 10, 25, and 50 DPI (P < 0.01). [file Table_6.xlsx]

## Sheet: Supplementary Table 6
	Supplementary Table 6 | GO terms significantly enriched by target genes of DEMs from the samples at 10, 25 and 50 DPI (P<0.01).
	Infection vs Control	GO accession	Description	Term type	Corrected p value
	BI-10 vs BC-10
		GO:0048518	positive regulation of biological process	biological process	1.7228e-25
		GO:0048584	positive regulation of response to stimulus	biological process	2.5159e-20
		GO:0048522	positive regulation of cellular process	biological process	5.0643e-20
		GO:0048583	regulation of response to stimulus	biological process	1.388e-18
		GO:0048519	negative regulation of biological process	biological process	1.9047e-15
		GO:0009893	positive regulation of metabolic process	biological process	2.6947e-15
		GO:0006950	response to stress	biological process	2.6947e-15
		GO:0008152	metabolic process	biological process	2.6491e-14
		GO:0010604	positive regulation of macromolecule metabolic process	biological process	2.7514e-14
		GO:0048523	negative regulation of cellular process	biological process	7.3895e-14
		GO:0002376	immune system process	biological process	4.6576e-13
		GO:0010647	positive regulation of cell communication	biological process	4.6947e-13
		GO:0031325	positive regulation of cellular metabolic process	biological process	9.2464e-13
		GO:0002682	regulation of immune system process	biological process	9.337e-13
		GO:0070887	cellular response to chemical stimulus	biological process	1.5704e-12
		GO:0023056	positive regulation of signaling	biological process	1.5704e-12
		GO:0009967	positive regulation of signal transduction	biological process	2.1677e-12
		GO:0006955	immune response	biological process	3.5184e-12
		GO:0010646	regulation of cell communication	biological process	6.7455e-12
		GO:0044238	primary metabolic process	biological process	8.5183e-12
		GO:0009966	regulation of signal transduction	biological process	9.5272e-12
		GO:0044710	single-organism metabolic process	biological process	1.0319e-11
		GO:0071704	organic substance metabolic process	biological process	1.6922e-11
		GO:0044237	cellular metabolic process	biological process	1.6928e-11
		GO:0019222	regulation of metabolic process	biological process	2.0009e-11
		GO:0023051	regulation of signaling	biological process	3.0234e-11
		GO:1902531	regulation of intracellular signal transduction	biological process	5.0853e-11
		GO:1902533	positive regulation of intracellular signal transduction	biological process	7.891e-11
		GO:0051179	localization	biological process	1.9389e-10
		GO:0010033	response to organic substance	biological process	3.5512e-10
		GO:0035556	intracellular signal transduction	biological process	3.9605e-10
		GO:0080134	regulation of response to stress	biological process	6.1428e-10
		GO:0048856	anatomical structure development	biological process	1.0666e-09
		GO:0002684	positive regulation of immune system process	biological process	1.1841e-09
		GO:0051246	regulation of protein metabolic process	biological process	1.6672e-09
		GO:0009605	response to external stimulus	biological process	1.9317e-09
		GO:0065009	regulation of molecular function	biological process	4.2493e-09
		GO:0051247	positive regulation of protein metabolic process	biological process	4.3314e-09
		GO:0009058	biosynthetic process	biological process	6.3485e-09
		GO:0044767	single-organism developmental process	biological process	8.318e-09
		GO:0080090	regulation of primary metabolic process	biological process	8.3323e-09
		GO:0032502	developmental process	biological process	8.6364e-09
		GO:0071310	cellular response to organic substance	biological process	9.4348e-09
		GO:0007275	multicellular organismal development	biological process	1.0995e-08
		GO:0010562	positive regulation of phosphorus metabolic process	biological process	1.2405e-08
		GO:0045937	positive regulation of phosphate metabolic process	biological process	1.2405e-08
		GO:0060255	regulation of macromolecule metabolic process	biological process	1.6166e-08
		GO:0001775	cell activation	biological process	2.0324e-08
		GO:0016310	phosphorylation	biological process	2.0324e-08
		GO:0032101	regulation of response to external stimulus	biological process	2.4235e-08
		GO:0031323	regulation of cellular metabolic process	biological process	2.6362e-08
		GO:0060341	regulation of cellular localization	biological process	3.0412e-08
		GO:0050776	regulation of immune response	biological process	3.1057e-08
		GO:0031401	positive regulation of protein modification process	biological process	3.2054e-08
		GO:0006954	inflammatory response	biological process	3.216e-08
		GO:0009891	positive regulation of biosynthetic process	biological process	3.3254e-08
		GO:0006793	phosphorus metabolic process	biological process	3.4353e-08
		GO:0071840	cellular component organization or biogenesis	biological process	4.1959e-08
		GO:0043170	macromolecule metabolic process	biological process	4.2122e-08
		GO:0016043	cellular component organization	biological process	4.7534e-08
		GO:0048731	system development	biological process	5.5e-08
		GO:0006796	phosphate-containing compound metabolic process	biological process	6.2226e-08
		GO:0030154	cell differentiation	biological process	6.7278e-08
		GO:0031328	positive regulation of cellular biosynthetic process	biological process	7.308e-08
		GO:0006366	transcription from RNA polymerase II promoter	biological process	7.3451e-08
		GO:0019538	protein metabolic process	biological process	7.4921e-08
		GO:0051234	establishment of localization	biological process	8.0444e-08
		GO:1901576	organic substance biosynthetic process	biological process	9.1817e-08
		GO:0032270	positive regulation of cellular protein metabolic process	biological process	9.6853e-08
		GO:0032879	regulation of localization	biological process	9.7628e-08
		GO:0006810	transport	biological process	1.0745e-07
		GO:0001934	positive regulation of protein phosphorylation	biological process	1.2501e-07
		GO:0006357	regulation of transcription from RNA polymerase II promoter	biological process	1.2868e-07
		GO:0042327	positive regulation of phosphorylation	biological process	1.3191e-07
		GO:0042325	regulation of phosphorylation	biological process	1.3496e-07
		GO:0010557	positive regulation of macromolecule biosynthetic process	biological process	1.3496e-07
		GO:0010941	regulation of cell death	biological process	1.6178e-07
		GO:0032268	regulation of cellular protein metabolic process	biological process	1.7807e-07
		GO:0031347	regulation of defense response	biological process	1.8042e-07
		GO:0006952	defense response	biological process	1.8042e-07
		GO:0050778	positive regulation of immune response	biological process	1.9632e-07
		GO:0032880	regulation of protein localization	biological process	2.0228e-07
		GO:0042981	regulation of apoptotic process	biological process	2.0521e-07
		GO:0065008	regulation of biological quality	biological process	2.3068e-07
		GO:0043067	regulation of programmed cell death	biological process	2.4877e-07
		GO:0006468	protein phosphorylation	biological process	2.4961e-07
		GO:0048513	organ development	biological process	2.6426e-07
		GO:0009892	negative regulation of metabolic process	biological process	2.6947e-07
		GO:0070201	regulation of establishment of protein localization	biological process	2.7166e-07
		GO:0051239	regulation of multicellular organismal process	biological process	3.1284e-07
		GO:0001932	regulation of protein phosphorylation	biological process	3.1663e-07
		GO:0009611	response to wounding	biological process	3.2358e-07
		GO:0050790	regulation of catalytic activity	biological process	4.059e-07
		GO:0051223	regulation of protein transport	biological process	5.3737e-07
		GO:0010628	positive regulation of gene expression	biological process	5.3737e-07
		GO:0045321	leukocyte activation	biological process	7.0683e-07
		GO:0032386	regulation of intracellular transport	biological process	7.3934e-07
		GO:1903827	regulation of cellular protein localization	biological process	7.3964e-07
		GO:0006915	apoptotic process	biological process	7.3964e-07
		GO:0044249	cellular biosynthetic process	biological process	8.0888e-07
		GO:0048869	cellular developmental process	biological process	8.1408e-07
		GO:0008219	cell death	biological process	8.1408e-07
		GO:0016265	death	biological process	8.1408e-07
		GO:0031324	negative regulation of cellular metabolic process	biological process	8.5666e-07
		GO:0051049	regulation of transport	biological process	9.5381e-07
		GO:0051174	regulation of phosphorus metabolic process	biological process	9.7957e-07
		GO:0045935	positive regulation of nucleobase-containing compound metabolic process	biological process	1.2336e-06
		GO:0012501	programmed cell death	biological process	1.3524e-06
		GO:0051173	positive regulation of nitrogen compound metabolic process	biological process	1.3538e-06
		GO:1902680	positive regulation of RNA biosynthetic process	biological process	1.4175e-06
		GO:0007166	cell surface receptor signaling pathway	biological process	1.4211e-06
		GO:0008283	cell proliferation	biological process	1.4662e-06
		GO:0019220	regulation of phosphate metabolic process	biological process	1.5947e-06
		GO:0051128	regulation of cellular component organization	biological process	1.6401e-06
		GO:0045893	positive regulation of transcription, DNA-templated	biological process	1.6401e-06
		GO:1903508	positive regulation of nucleic acid-templated transcription	biological process	1.6401e-06
		GO:0032103	positive regulation of response to external stimulus	biological process	1.6548e-06
		GO:0018193	peptidyl-amino acid modification	biological process	1.6635e-06
		GO:0051641	cellular localization	biological process	1.8528e-06
		GO:0044255	cellular lipid metabolic process	biological process	2.0856e-06
		GO:1902578	single-organism localization	biological process	2.1797e-06
		GO:0001816	cytokine production	biological process	2.2223e-06
		GO:0051254	positive regulation of RNA metabolic process	biological process	2.2512e-06
		GO:0043065	positive regulation of apoptotic process	biological process	3.0601e-06
		GO:0010942	positive regulation of cell death	biological process	3.4555e-06
		GO:0044765	single-organism transport	biological process	3.7595e-06
		GO:0008104	protein localization	biological process	4.0326e-06
		GO:0043068	positive regulation of programmed cell death	biological process	4.0672e-06
		GO:0031399	regulation of protein modification process	biological process	4.0836e-06
		GO:0022610	biological adhesion	biological process	4.2838e-06
		GO:0044260	cellular macromolecule metabolic process	biological process	4.4283e-06
		GO:0033554	cellular response to stress	biological process	4.8952e-06
		GO:0042127	regulation of cell proliferation	biological process	4.935e-06
		GO:0051240	positive regulation of multicellular organismal process	biological process	5.302e-06
		GO:0060326	cell chemotaxis	biological process	5.445e-06
		GO:0006464	cellular protein modification process	biological process	5.4967e-06
		GO:0036211	protein modification process	biological process	5.4967e-06
		GO:1903649	regulation of cytoplasmic transport	biological process	5.7892e-06
		GO:0007155	cell adhesion	biological process	6.4131e-06
		GO:0061024	membrane organization	biological process	6.9331e-06
		GO:0044802	single-organism membrane organization	biological process	7.8374e-06
		GO:0016477	cell migration	biological process	7.9557e-06
		GO:0002764	immune response-regulating signaling pathway	biological process	8.2852e-06
		GO:0071702	organic substance transport	biological process	8.8514e-06
		GO:0033036	macromolecule localization	biological process	9.368e-06
		GO:0016337	single organismal cell-cell adhesion	biological process	1.0206e-05
		GO:0044092	negative regulation of molecular function	biological process	1.0643e-05
		GO:0043412	macromolecule modification	biological process	1.0643e-05
		GO:0031349	positive regulation of defense response	biological process	1.0695e-05
		GO:0001817	regulation of cytokine production	biological process	1.0875e-05
		GO:0040011	locomotion	biological process	1.0937e-05
		GO:0048870	cell motility	biological process	1.0937e-05
		GO:0051674	localization of cell	biological process	1.0937e-05
		GO:0009059	macromolecule biosynthetic process	biological process	1.1968e-05
		GO:0043123	positive regulation of I-kappaB kinase/NF-kappaB signaling	biological process	1.3526e-05
		GO:0001819	positive regulation of cytokine production	biological process	1.5017e-05
		GO:0043408	regulation of MAPK cascade	biological process	1.6655e-05
		GO:0002253	activation of immune response	biological process	1.7014e-05
		GO:0051050	positive regulation of transport	biological process	1.7128e-05
		GO:0006807	nitrogen compound metabolic process	biological process	1.7484e-05
		GO:0044267	cellular protein metabolic process	biological process	1.9651e-05
		GO:0009607	response to biotic stimulus	biological process	1.9685e-05
		GO:0040007	growth	biological process	2.1795e-05
		GO:0045184	establishment of protein localization	biological process	2.2118e-05
		GO:0009888	tissue development	biological process	2.2167e-05
		GO:0009719	response to endogenous stimulus	biological process	2.3055e-05
		GO:0018212	peptidyl-tyrosine modification	biological process	2.3296e-05
		GO:0097529	myeloid leukocyte migration	biological process	2.4239e-05
		GO:0010605	negative regulation of macromolecule metabolic process	biological process	2.4359e-05
		GO:1903034	regulation of response to wounding	biological process	2.4577e-05
		GO:0002757	immune response-activating signal transduction	biological process	2.4788e-05
		GO:0045595	regulation of cell differentiation	biological process	2.5974e-05
		GO:0060548	negative regulation of cell death	biological process	3.0093e-05
		GO:0043069	negative regulation of programmed cell death	biological process	3.174e-05
		GO:0002688	regulation of leukocyte chemotaxis	biological process	3.174e-05
		GO:0051649	establishment of localization in cell	biological process	3.174e-05
		GO:0050727	regulation of inflammatory response	biological process	3.1753e-05
		GO:0006897	endocytosis	biological process	3.2387e-05
		GO:0034645	cellular macromolecule biosynthetic process	biological process	3.3249e-05
		GO:0033157	regulation of intracellular protein transport	biological process	3.6433e-05
		GO:0046649	lymphocyte activation	biological process	3.6433e-05
		GO:0043066	negative regulation of apoptotic process	biological process	3.7566e-05
		GO:0051172	negative regulation of nitrogen compound metabolic process	biological process	3.7788e-05
		GO:0050921	positive regulation of chemotaxis	biological process	4.9014e-05
		GO:0030595	leukocyte chemotaxis	biological process	5.3232e-05
		GO:0048520	positive regulation of behavior	biological process	5.6032e-05
		GO:0050793	regulation of developmental process	biological process	5.6301e-05
		GO:0000165	MAPK cascade	biological process	5.9208e-05
		GO:0015031	protein transport	biological process	6.5707e-05
		GO:0002690	positive regulation of leukocyte chemotaxis	biological process	7.3024e-05
		GO:0044699	single-organism process	biological process	7.5792e-05
		GO:1902679	negative regulation of RNA biosynthetic process	biological process	8.0969e-05
		GO:0006629	lipid metabolic process	biological process	8.2846e-05
		GO:0016192	vesicle-mediated transport	biological process	8.5284e-05
		GO:0034109	homotypic cell-cell adhesion	biological process	9.2154e-05
		GO:0007249	I-kappaB kinase/NF-kappaB signaling	biological process	9.2952e-05
		GO:0018108	peptidyl-tyrosine phosphorylation	biological process	9.7114e-05
		GO:0048585	negative regulation of response to stimulus	biological process	0.00011985
		GO:0098602	single organism cell adhesion	biological process	0.00012604
		GO:0002687	positive regulation of leukocyte migration	biological process	0.00012604
		GO:0045934	negative regulation of nucleobase-containing compound metabolic process	biological process	0.00013032
		GO:0002252	immune effector process	biological process	0.00013107
		GO:0044711	single-organism biosynthetic process	biological process	0.00013107
		GO:0001944	vasculature development	biological process	0.00014169
		GO:1901700	response to oxygen-containing compound	biological process	0.00015284
		GO:0043436	oxoacid metabolic process	biological process	0.00015505
		GO:0043410	positive regulation of MAPK cascade	biological process	0.00015505
		GO:0023014	signal transduction by protein phosphorylation	biological process	0.00015505
		GO:0042592	homeostatic process	biological process	0.00016266
		GO:0045892	negative regulation of transcription, DNA-templated	biological process	0.00017846
		GO:0050865	regulation of cell activation	biological process	0.00018209
		GO:0050900	leukocyte migration	biological process	0.00019002
		GO:0043207	response to external biotic stimulus	biological process	0.00019267
		GO:0051707	response to other organism	biological process	0.00019267
		GO:0040012	regulation of locomotion	biological process	0.00020331
		GO:0007159	leukocyte cell-cell adhesion	biological process	0.00020878
		GO:0010629	negative regulation of gene expression	biological process	0.00021573
		GO:0043901	negative regulation of multi-organism process	biological process	0.00023282
		GO:0006082	organic acid metabolic process	biological process	0.00023766
		GO:0044281	small molecule metabolic process	biological process	0.0002396
		GO:0051253	negative regulation of RNA metabolic process	biological process	0.0002474
		GO:0009890	negative regulation of biosynthetic process	biological process	0.00026418
		GO:0043122	regulation of I-kappaB kinase/NF-kappaB signaling	biological process	0.00028657
		GO:0002443	leukocyte mediated immunity	biological process	0.00028657
		GO:0009889	regulation of biosynthetic process	biological process	0.00030044
		GO:0031327	negative regulation of cellular biosynthetic process	biological process	0.0003143
		GO:0048534	hematopoietic or lymphoid organ development	biological process	0.0003182
		GO:0019752	carboxylic acid metabolic process	biological process	0.0003188
		GO:0034097	response to cytokine	biological process	0.00032598
		GO:0001568	blood vessel development	biological process	0.00032692
		GO:0051336	regulation of hydrolase activity	biological process	0.00033264
		GO:0030334	regulation of cell migration	biological process	0.00034448
		GO:0019722	calcium-mediated signaling	biological process	0.00034975
		GO:2000026	regulation of multicellular organismal development	biological process	0.00035642
		GO:2000145	regulation of cell motility	biological process	0.0003576
		GO:0051094	positive regulation of developmental process	biological process	0.00038032
		GO:0045088	regulation of innate immune response	biological process	0.00039282
		GO:0031326	regulation of cellular biosynthetic process	biological process	0.00039564
		GO:1903507	negative regulation of nucleic acid-templated transcription	biological process	0.00041031
		GO:0070727	cellular macromolecule localization	biological process	0.00046065
		GO:0045944	positive regulation of transcription from RNA polymerase II promoter	biological process	0.00046567
		GO:0044093	positive regulation of molecular function	biological process	0.00046567
		GO:0002697	regulation of immune effector process	biological process	0.00048467
		GO:0051130	positive regulation of cellular component organization	biological process	0.00050427
		GO:1901360	organic cyclic compound metabolic process	biological process	0.00053857
		GO:0045087	innate immune response	biological process	0.00054805
		GO:0002685	regulation of leukocyte migration	biological process	0.00059222
		GO:0097530	granulocyte migration	biological process	0.00061302
		GO:0008630	intrinsic apoptotic signaling pathway in response to DNA damage	biological process	0.00061831
		GO:0030097	hemopoiesis	biological process	0.00062191
		GO:1901362	organic cyclic compound biosynthetic process	biological process	0.00062191
		GO:0002694	regulation of leukocyte activation	biological process	0.00063203
		GO:0061448	connective tissue development	biological process	0.00063238
		GO:0010558	negative regulation of macromolecule biosynthetic process	biological process	0.0006458
		GO:0051222	positive regulation of protein transport	biological process	0.00065014
		GO:0034613	cellular protein localization	biological process	0.00066681
		GO:0010468	regulation of gene expression	biological process	0.00067075
		GO:0032388	positive regulation of intracellular transport	biological process	0.00071456
		GO:0008610	lipid biosynthetic process	biological process	0.0007167
		GO:0071345	cellular response to cytokine stimulus	biological process	0.00072338
		GO:0002703	regulation of leukocyte mediated immunity	biological process	0.00072338
		GO:0070486	leukocyte aggregation	biological process	0.00076729
		GO:0034641	cellular nitrogen compound metabolic process	biological process	0.00079068
		GO:1900180	regulation of protein localization to nucleus	biological process	0.00079068
		GO:0043009	chordate embryonic development	biological process	0.0008259
		GO:0030162	regulation of proteolysis	biological process	0.00084302
		GO:0046907	intracellular transport	biological process	0.00085046
		GO:0048646	anatomical structure formation involved in morphogenesis	biological process	0.0008528
		GO:2001235	positive regulation of apoptotic signaling pathway	biological process	0.0009153
		GO:0033993	response to lipid	biological process	0.00096384
		GO:0006725	cellular aromatic compound metabolic process	biological process	0.00097161
		GO:0018130	heterocycle biosynthetic process	biological process	0.0010824
		GO:2000113	negative regulation of cellular macromolecule biosynthetic process	biological process	0.0010863
		GO:0009792	embryo development ending in birth or egg hatching	biological process	0.0010863
		GO:0048878	chemical homeostasis	biological process	0.001132
		GO:0034654	nucleobase-containing compound biosynthetic process	biological process	0.001132
		GO:0050920	regulation of chemotaxis	biological process	0.0011505
		GO:1902582	single-organism intracellular transport	biological process	0.0011683
		GO:0045597	positive regulation of cell differentiation	biological process	0.0011713
		GO:0071621	granulocyte chemotaxis	biological process	0.0012284
		GO:1990266	neutrophil migration	biological process	0.0012475
		GO:0001701	in utero embryonic development	biological process	0.001284
		GO:0002705	positive regulation of leukocyte mediated immunity	biological process	0.0013994
		GO:0051171	regulation of nitrogen compound metabolic process	biological process	0.0014437
		GO:0000271	polysaccharide biosynthetic process	biological process	0.0014514
		GO:0002758	innate immune response-activating signal transduction	biological process	0.0014746
		GO:0030593	neutrophil chemotaxis	biological process	0.0014746
		GO:0046483	heterocycle metabolic process	biological process	0.0015278
		GO:0019438	aromatic compound biosynthetic process	biological process	0.0015359
		GO:0097190	apoptotic signaling pathway	biological process	0.0016441
		GO:0051270	regulation of cellular component movement	biological process	0.0016935
		GO:1903651	positive regulation of cytoplasmic transport	biological process	0.0017096
		GO:0010556	regulation of macromolecule biosynthetic process	biological process	0.0017613
		GO:0044271	cellular nitrogen compound biosynthetic process	biological process	0.0017764
		GO:0033692	cellular polysaccharide biosynthetic process	biological process	0.0018204
		GO:0097285	cell-type specific apoptotic process	biological process	0.0018327
		GO:0009056	catabolic process	biological process	0.0018327
		GO:0071495	cellular response to endogenous stimulus	biological process	0.0018327
		GO:0008284	positive regulation of cell proliferation	biological process	0.0018327
		GO:0002221	pattern recognition receptor signaling pathway	biological process	0.0018327
		GO:0002218	activation of innate immune response	biological process	0.0018571
		GO:0002521	leukocyte differentiation	biological process	0.0019869
		GO:2001233	regulation of apoptotic signaling pathway	biological process	0.0020336
		GO:0044712	single-organism catabolic process	biological process	0.0020336
		GO:0042060	wound healing	biological process	0.0021565
		GO:0032635	interleukin-6 production	biological process	0.0021565
		GO:0071706	tumor necrosis factor superfamily cytokine production	biological process	0.0021565
		GO:0071356	cellular response to tumor necrosis factor	biological process	0.002164
		GO:0072593	reactive oxygen species metabolic process	biological process	0.0022013
		GO:0006139	nucleobase-containing compound metabolic process	biological process	0.0022206
		GO:0002520	immune system development	biological process	0.0022233
		GO:0048468	cell development	biological process	0.0022506
		GO:0034405	response to fluid shear stress	biological process	0.0022648
		GO:1903706	regulation of hemopoiesis	biological process	0.0022975
		GO:0006909	phagocytosis	biological process	0.0023185
		GO:0034637	cellular carbohydrate biosynthetic process	biological process	0.0023185
		GO:2000112	regulation of cellular macromolecule biosynthetic process	biological process	0.0023197
		GO:0000122	negative regulation of transcription from RNA polymerase II promoter	biological process	0.002344
		GO:0052548	regulation of endopeptidase activity	biological process	0.0023815
		GO:0045089	positive regulation of innate immune response	biological process	0.0023836
		GO:0042743	hydrogen peroxide metabolic process	biological process	0.0024833
		GO:2000177	regulation of neural precursor cell proliferation	biological process	0.0024994
		GO:0001525	angiogenesis	biological process	0.0026068
		GO:0046822	regulation of nucleocytoplasmic transport	biological process	0.0026207
		GO:0032675	regulation of interleukin-6 production	biological process	0.002647
		GO:0006928	movement of cell or subcellular component	biological process	0.0027778
		GO:0051093	negative regulation of developmental process	biological process	0.0027998
		GO:0032846	positive regulation of homeostatic process	biological process	0.0028138
		GO:0048514	blood vessel morphogenesis	biological process	0.0028916
		GO:1903533	regulation of protein targeting	biological process	0.0029663
		GO:0050729	positive regulation of inflammatory response	biological process	0.0030704
		GO:0042110	T cell activation	biological process	0.0030704
		GO:0070489	T cell aggregation	biological process	0.0030704
		GO:0051704	multi-organism process	biological process	0.0031054
		GO:0032787	monocarboxylic acid metabolic process	biological process	0.003319
		GO:0071593	lymphocyte aggregation	biological process	0.0034403
		GO:0040017	positive regulation of locomotion	biological process	0.0034493
		GO:1903555	regulation of tumor necrosis factor superfamily cytokine production	biological process	0.0034577
		GO:0051090	regulation of sequence-specific DNA binding transcription factor activity	biological process	0.003478
		GO:0061025	membrane fusion	biological process	0.0035654
		GO:1903829	positive regulation of cellular protein localization	biological process	0.0035782
		GO:0042306	regulation of protein import into nucleus	biological process	0.0035985
		GO:0032872	regulation of stress-activated MAPK cascade	biological process	0.0035985
		GO:0051241	negative regulation of multicellular organismal process	biological process	0.0037357
		GO:0002683	negative regulation of immune system process	biological process	0.0038596
		GO:0055114	oxidation-reduction process	biological process	0.0038596
		GO:0010467	gene expression	biological process	0.0038614
		GO:0032774	RNA biosynthetic process	biological process	0.0039396
		GO:0032715	negative regulation of interleukin-6 production	biological process	0.0040481
		GO:0019932	second-messenger-mediated signaling	biological process	0.0040869
		GO:2000403	positive regulation of lymphocyte migration	biological process	0.004213
		GO:0030335	positive regulation of cell migration	biological process	0.0042388
		GO:0007229	integrin-mediated signaling pathway	biological process	0.004279
		GO:1904589	regulation of protein import	biological process	0.004279
		GO:0070302	regulation of stress-activated protein kinase signaling cascade	biological process	0.004279
		GO:0007009	plasma membrane organization	biological process	0.004279
		GO:0042692	muscle cell differentiation	biological process	0.0042831
		GO:0044763	single-organism cellular process	biological process	0.0042831
		GO:1903036	positive regulation of response to wounding	biological process	0.0043615
		GO:0097659	nucleic acid-templated transcription	biological process	0.0044151
		GO:0032609	interferon-gamma production	biological process	0.0044743
		GO:0034612	response to tumor necrosis factor	biological process	0.0044994
		GO:0006351	transcription, DNA-templated	biological process	0.0046043
		GO:0043086	negative regulation of catalytic activity	biological process	0.004814
		GO:0098609	cell-cell adhesion	biological process	0.0048185
		GO:0051216	cartilage development	biological process	0.0048714
		GO:0051051	negative regulation of transport	biological process	0.0048714
		GO:2000147	positive regulation of cell motility	biological process	0.0048714
		GO:0043900	regulation of multi-organism process	biological process	0.0049382
		GO:1902532	negative regulation of intracellular signal transduction	biological process	0.0049567
		GO:0016482	cytoplasmic transport	biological process	0.0049981
		GO:0042113	B cell activation	biological process	0.0050121
		GO:0043415	positive regulation of skeletal muscle tissue regeneration	biological process	0.0050619
		GO:0032387	negative regulation of intracellular transport	biological process	0.0051962
		GO:0006935	chemotaxis	biological process	0.0052285
		GO:0042330	taxis	biological process	0.0052285
		GO:0032680	regulation of tumor necrosis factor production	biological process	0.0054302
		GO:0048871	multicellular organismal homeostasis	biological process	0.0055505
		GO:0019221	cytokine-mediated signaling pathway	biological process	0.0058286
		GO:0043491	protein kinase B signaling	biological process	0.0058324
		GO:0009103	lipopolysaccharide biosynthetic process	biological process	0.0059128
		GO:0051248	negative regulation of protein metabolic process	biological process	0.0059631
		GO:0001704	formation of primary germ layer	biological process	0.0061115
		GO:2001141	regulation of RNA biosynthetic process	biological process	0.0061115
		GO:0010648	negative regulation of cell communication	biological process	0.0061649
		GO:1903506	regulation of nucleic acid-templated transcription	biological process	0.0063992
		GO:0051249	regulation of lymphocyte activation	biological process	0.0064967
		GO:1903828	negative regulation of cellular protein localization	biological process	0.0065738
		GO:1902580	single-organism cellular localization	biological process	0.0065916
		GO:0006355	regulation of transcription, DNA-templated	biological process	0.0066875
		GO:0002706	regulation of lymphocyte mediated immunity	biological process	0.006755
		GO:0001503	ossification	biological process	0.0068548
		GO:0043085	positive regulation of catalytic activity	biological process	0.0068566
		GO:0032640	tumor necrosis factor production	biological process	0.0069612
		GO:0050731	positive regulation of peptidyl-tyrosine phosphorylation	biological process	0.0069848
		GO:0030155	regulation of cell adhesion	biological process	0.0070343
		GO:0030198	extracellular matrix organization	biological process	0.0070503
		GO:0009968	negative regulation of signal transduction	biological process	0.0071784
		GO:0019219	regulation of nucleobase-containing compound metabolic process	biological process	0.0074507
		GO:0009653	anatomical structure morphogenesis	biological process	0.0077043
		GO:0090304	nucleic acid metabolic process	biological process	0.0078383
		GO:1901606	alpha-amino acid catabolic process	biological process	0.0080602
		GO:0043062	extracellular structure organization	biological process	0.008122
		GO:0008653	lipopolysaccharide metabolic process	biological process	0.0081882
		GO:0032874	positive regulation of stress-activated MAPK cascade	biological process	0.0084109
		GO:0052547	regulation of peptidase activity	biological process	0.0085142
		GO:0051272	positive regulation of cellular component movement	biological process	0.008532
		GO:1901701	cellular response to oxygen-containing compound	biological process	0.0087288
		GO:0046330	positive regulation of JNK cascade	biological process	0.0087306
		GO:0002708	positive regulation of lymphocyte mediated immunity	biological process	0.0087617
		GO:0002699	positive regulation of immune effector process	biological process	0.0087617
		GO:0048589	developmental growth	biological process	0.0089246
		GO:0032637	interleukin-8 production	biological process	0.0091511
		GO:0006886	intracellular protein transport	biological process	0.0094611
		GO:0060627	regulation of vesicle-mediated transport	biological process	0.009581
		GO:0044248	cellular catabolic process	biological process	0.0099671
		GO:0043227	membrane-bounded organelle	cellular component	1.0165e-22
		GO:0043226	organelle	cellular component	2.3753e-21
		GO:0044424	intracellular part	cellular component	5.2397e-18
		GO:0005622	intracellular	cellular component	1.4837e-17
		GO:0005737	cytoplasm	cellular component	7.6734e-17
		GO:0043231	intracellular membrane-bounded organelle	cellular component	1.1252e-14
		GO:0043229	intracellular organelle	cellular component	3.6094e-14
		GO:0031982	vesicle	cellular component	8.5183e-12
		GO:0005576	extracellular region	cellular component	9.0884e-11
		GO:0044421	extracellular region part	cellular component	1.8682e-10
		GO:0031988	membrane-bounded vesicle	cellular component	1.9363e-10
		GO:1903561	extracellular vesicle	cellular component	1.029e-09
		GO:0043230	extracellular organelle	cellular component	1.0666e-09
		GO:0070062	extracellular exosome	cellular component	1.1841e-09
		GO:0065010	extracellular membrane-bounded organelle	cellular component	1.2554e-09
		GO:0044444	cytoplasmic part	cellular component	4.8304e-09
		GO:0005739	mitochondrion	cellular component	9.4807e-08
		GO:0044422	organelle part	cellular component	1.5265e-07
		GO:0005623	cell	cellular component	3.0129e-07
		GO:0044464	cell part	cellular component	4.5852e-07
		GO:0044446	intracellular organelle part	cellular component	4.8457e-07
		GO:0031974	membrane-enclosed lumen	cellular component	9.5381e-07
		GO:0070013	intracellular organelle lumen	cellular component	9.6681e-07
		GO:0043233	organelle lumen	cellular component	1.1349e-06
		GO:0044428	nuclear part	cellular component	6.4131e-06
		GO:0031981	nuclear lumen	cellular component	1.0393e-05
		GO:0005654	nucleoplasm	cellular component	1.9651e-05
		GO:0098552	side of membrane	cellular component	2.2118e-05
		GO:0030054	cell junction	cellular component	9.6248e-05
		GO:0044459	plasma membrane part	cellular component	0.00013032
		GO:0009897	external side of plasma membrane	cellular component	0.0001506
		GO:0005634	nucleus	cellular component	0.00015505
		GO:0012505	endomembrane system	cellular component	0.00037667
		GO:0031090	organelle membrane	cellular component	0.0010778
		GO:0005615	extracellular space	cellular component	0.0010824
		GO:0009986	cell surface	cellular component	0.0011547
		GO:0005575	cellular_component	cellular component	0.0027707
		GO:0031012	extracellular matrix	cellular component	0.0030857
		GO:0005794	Golgi apparatus	cellular component	0.0036022
		GO:0030055	cell-substrate junction	cellular component	0.0037135
		GO:0031253	cell projection membrane	cellular component	0.0044743
		GO:0044431	Golgi apparatus part	cellular component	0.0070614
		GO:0005924	cell-substrate adherens junction	cellular component	0.0071034
		GO:0005912	adherens junction	cellular component	0.0074719
		GO:0005911	cell-cell junction	cellular component	0.0081308
		GO:0005515	protein binding	molecular function	7.9992e-36
		GO:0005488	binding	molecular function	4.2919e-28
		GO:0005102	receptor binding	molecular function	5.5153e-07
		GO:0098772	molecular function regulator	molecular function	1.9651e-05
		GO:0030234	enzyme regulator activity	molecular function	3.1557e-05
		GO:0008289	lipid binding	molecular function	0.00035547
		GO:0005178	integrin binding	molecular function	0.00073511
		GO:0003824	catalytic activity	molecular function	0.00084302
		GO:0044877	macromolecular complex binding	molecular function	0.0016469
		GO:0050839	cell adhesion molecule binding	molecular function	0.0018327
		GO:0019899	enzyme binding	molecular function	0.0033414
		GO:0004715	non-membrane spanning protein tyrosine kinase activity	molecular function	0.0042388
		GO:0030246	carbohydrate binding	molecular function	0.0045304
		GO:0016301	kinase activity	molecular function	0.0054919
		GO:0042802	identical protein binding	molecular function	0.0067987
		GO:0016773	phosphotransferase activity, alcohol group as acceptor	molecular function	0.0072895
		GO:0043168	anion binding	molecular function	0.0073443
		GO:0005539	glycosaminoglycan binding	molecular function	0.0079037
		GO:0016772	transferase activity, transferring phosphorus-containing groups	molecular function	0.0082015
	BI-25 vs BC-25
		GO:0048518	positive regulation of biological process	biological process	5.4594e-17
		GO:0048522	positive regulation of cellular process	biological process	3.359e-12
		GO:0048583	regulation of response to stimulus	biological process	9.5217e-12
		GO:0009893	positive regulation of metabolic process	biological process	2.6436e-11
		GO:0048519	negative regulation of biological process	biological process	4.7287e-10
		GO:0048523	negative regulation of cellular process	biological process	6.767e-10
		GO:0008152	metabolic process	biological process	1.2156e-09
		GO:0048584	positive regulation of response to stimulus	biological process	1.2891e-09
		GO:0010604	positive regulation of macromolecule metabolic process	biological process	2.6534e-09
		GO:0019222	regulation of metabolic process	biological process	9.5932e-09
		GO:0016310	phosphorylation	biological process	1.292e-08
		GO:0006793	phosphorus metabolic process	biological process	1.4376e-08
		GO:0031325	positive regulation of cellular metabolic process	biological process	1.4524e-08
		GO:0048856	anatomical structure development	biological process	3.0322e-08
		GO:0044238	primary metabolic process	biological process	3.5484e-08
		GO:0007275	multicellular organismal development	biological process	3.5484e-08
		GO:0010646	regulation of cell communication	biological process	3.6641e-08
		GO:0006796	phosphate-containing compound metabolic process	biological process	3.9583e-08
		GO:0048731	system development	biological process	4.1721e-08
		GO:0071704	organic substance metabolic process	biological process	6.9581e-08
		GO:0010647	positive regulation of cell communication	biological process	9.1663e-08
		GO:0044767	single-organism developmental process	biological process	1.5563e-07
		GO:0006950	response to stress	biological process	1.6325e-07
		GO:0044237	cellular metabolic process	biological process	1.8729e-07
		GO:0032502	developmental process	biological process	1.9355e-07
		GO:0023051	regulation of signaling	biological process	1.9989e-07
		GO:0051246	regulation of protein metabolic process	biological process	2.0358e-07
		GO:0023056	positive regulation of signaling	biological process	2.1295e-07
		GO:0009966	regulation of signal transduction	biological process	2.4522e-07
		GO:0030154	cell differentiation	biological process	5.1598e-07
		GO:0048513	organ development	biological process	7.6968e-07
		GO:0006468	protein phosphorylation	biological process	8.0901e-07
		GO:0060255	regulation of macromolecule metabolic process	biological process	9.0845e-07
		GO:0019538	protein metabolic process	biological process	1.2997e-06
		GO:0080090	regulation of primary metabolic process	biological process	1.2997e-06
		GO:0035556	intracellular signal transduction	biological process	1.395e-06
		GO:0065009	regulation of molecular function	biological process	1.793e-06
		GO:0002376	immune system process	biological process	2.0752e-06
		GO:0009967	positive regulation of signal transduction	biological process	2.6343e-06
		GO:0031324	negative regulation of cellular metabolic process	biological process	2.8841e-06
		GO:0048869	cellular developmental process	biological process	3.6945e-06
		GO:0031323	regulation of cellular metabolic process	biological process	3.6945e-06
		GO:0051179	localization	biological process	4.6702e-06
		GO:0009892	negative regulation of metabolic process	biological process	4.9223e-06
		GO:0010033	response to organic substance	biological process	5.4257e-06
		GO:0043170	macromolecule metabolic process	biological process	5.521e-06
		GO:0009891	positive regulation of biosynthetic process	biological process	7.3331e-06
		GO:0031328	positive regulation of cellular biosynthetic process	biological process	9.0002e-06
		GO:0045935	positive regulation of nucleobase-containing compound metabolic process	biological process	1.1179e-05
		GO:0010557	positive regulation of macromolecule biosynthetic process	biological process	1.1432e-05
		GO:0045893	positive regulation of transcription, DNA-templated	biological process	1.3438e-05
		GO:1903508	positive regulation of nucleic acid-templated transcription	biological process	1.3438e-05
		GO:0042127	regulation of cell proliferation	biological process	1.3833e-05
		GO:0010628	positive regulation of gene expression	biological process	1.4261e-05
		GO:0007166	cell surface receptor signaling pathway	biological process	1.4326e-05
		GO:0006955	immune response	biological process	1.4326e-05
		GO:0032268	regulation of cellular protein metabolic process	biological process	1.4326e-05
		GO:0080134	regulation of response to stress	biological process	1.4362e-05
		GO:0051173	positive regulation of nitrogen compound metabolic process	biological process	1.4362e-05
		GO:0042325	regulation of phosphorylation	biological process	1.4362e-05
		GO:1902680	positive regulation of RNA biosynthetic process	biological process	1.4425e-05
		GO:0051128	regulation of cellular component organization	biological process	1.5353e-05
		GO:0070887	cellular response to chemical stimulus	biological process	1.7298e-05
		GO:0008283	cell proliferation	biological process	1.7901e-05
		GO:0006357	regulation of transcription from RNA polymerase II promoter	biological process	2.2528e-05
		GO:0044710	single-organism metabolic process	biological process	2.2528e-05
		GO:1902531	regulation of intracellular signal transduction	biological process	2.4505e-05
		GO:0010605	negative regulation of macromolecule metabolic process	biological process	3.0002e-05
		GO:0065008	regulation of biological quality	biological process	3.0606e-05
		GO:0006366	transcription from RNA polymerase II promoter	biological process	3.2174e-05
		GO:0051254	positive regulation of RNA metabolic process	biological process	3.2649e-05
		GO:0051094	positive regulation of developmental process	biological process	4.0609e-05
		GO:0048646	anatomical structure formation involved in morphogenesis	biological process	4.3056e-05
		GO:0051174	regulation of phosphorus metabolic process	biological process	5.1665e-05
		GO:1902533	positive regulation of intracellular signal transduction	biological process	5.4077e-05
		GO:0050793	regulation of developmental process	biological process	5.7499e-05
		GO:0019220	regulation of phosphate metabolic process	biological process	6.4047e-05
		GO:0001932	regulation of protein phosphorylation	biological process	6.4775e-05
		GO:0050790	regulation of catalytic activity	biological process	6.5428e-05
		GO:0045597	positive regulation of cell differentiation	biological process	6.732e-05
		GO:0009605	response to external stimulus	biological process	6.8899e-05
		GO:0031399	regulation of protein modification process	biological process	7.2964e-05
		GO:0031327	negative regulation of cellular biosynthetic process	biological process	7.5089e-05
		GO:0009890	negative regulation of biosynthetic process	biological process	7.8315e-05
		GO:0010629	negative regulation of gene expression	biological process	8.5728e-05
		GO:0051172	negative regulation of nitrogen compound metabolic process	biological process	0.00013801
		GO:0010562	positive regulation of phosphorus metabolic process	biological process	0.00016187
		GO:0045937	positive regulation of phosphate metabolic process	biological process	0.00016187
		GO:0022610	biological adhesion	biological process	0.00020562
		GO:0044255	cellular lipid metabolic process	biological process	0.00022476
		GO:0051239	regulation of multicellular organismal process	biological process	0.0002718
		GO:0045934	negative regulation of nucleobase-containing compound metabolic process	biological process	0.00029082
		GO:0007155	cell adhesion	biological process	0.00029082
		GO:0071310	cellular response to organic substance	biological process	0.00029134
		GO:1902679	negative regulation of RNA biosynthetic process	biological process	0.0003406
		GO:0051253	negative regulation of RNA metabolic process	biological process	0.00045271
		GO:0031401	positive regulation of protein modification process	biological process	0.00052526
		GO:0045892	negative regulation of transcription, DNA-templated	biological process	0.00053582
		GO:0061448	connective tissue development	biological process	0.000539
		GO:0045944	positive regulation of transcription from RNA polymerase II promoter	biological process	0.00059928
		GO:0010558	negative regulation of macromolecule biosynthetic process	biological process	0.00059928
		GO:0006464	cellular protein modification process	biological process	0.0006769
		GO:0036211	protein modification process	biological process	0.0006769
		GO:0006810	transport	biological process	0.00083752
		GO:0051247	positive regulation of protein metabolic process	biological process	0.0008933
		GO:0051234	establishment of localization	biological process	0.00090661
		GO:1903507	negative regulation of nucleic acid-templated transcription	biological process	0.00092593
		GO:0045595	regulation of cell differentiation	biological process	0.00093721
		GO:0040007	growth	biological process	0.0009868
		GO:0031347	regulation of defense response	biological process	0.0010024
		GO:0044267	cellular protein metabolic process	biological process	0.0010477
		GO:0032879	regulation of localization	biological process	0.0011527
		GO:0009058	biosynthetic process	biological process	0.0011663
		GO:2000113	negative regulation of cellular macromolecule biosynthetic process	biological process	0.0012064
		GO:0051240	positive regulation of multicellular organismal process	biological process	0.0013279
		GO:0042327	positive regulation of phosphorylation	biological process	0.0014482
		GO:0048585	negative regulation of response to stimulus	biological process	0.0015085
		GO:0002682	regulation of immune system process	biological process	0.0015822
		GO:0043412	macromolecule modification	biological process	0.0015895
		GO:0050776	regulation of immune response	biological process	0.001654
		GO:0001701	in utero embryonic development	biological process	0.0017928
		GO:1901576	organic substance biosynthetic process	biological process	0.0019182
		GO:0044249	cellular biosynthetic process	biological process	0.0019379
		GO:0044260	cellular macromolecule metabolic process	biological process	0.0019851
		GO:0006897	endocytosis	biological process	0.0020024
		GO:0001934	positive regulation of protein phosphorylation	biological process	0.0022823
		GO:1903034	regulation of response to wounding	biological process	0.002384
		GO:0010941	regulation of cell death	biological process	0.0024162
		GO:0009888	tissue development	biological process	0.0024514
		GO:2000026	regulation of multicellular organismal development	biological process	0.0024692
		GO:0050727	regulation of inflammatory response	biological process	0.0026892
		GO:0032880	regulation of protein localization	biological process	0.0026892
		GO:0032101	regulation of response to external stimulus	biological process	0.0026892
		GO:0015031	protein transport	biological process	0.0026898
		GO:0060341	regulation of cellular localization	biological process	0.0027285
		GO:0009894	regulation of catabolic process	biological process	0.0028542
		GO:0008219	cell death	biological process	0.0028617
		GO:0016265	death	biological process	0.0028617
		GO:0009653	anatomical structure morphogenesis	biological process	0.0029446
		GO:0071702	organic substance transport	biological process	0.0029861
		GO:0071840	cellular component organization or biogenesis	biological process	0.0030796
		GO:1903827	regulation of cellular protein localization	biological process	0.0033576
		GO:0016043	cellular component organization	biological process	0.0034318
		GO:0009611	response to wounding	biological process	0.0034369
		GO:0044711	single-organism biosynthetic process	biological process	0.0034369
		GO:0044699	single-organism process	biological process	0.003465
		GO:0016051	carbohydrate biosynthetic process	biological process	0.0035758
		GO:0032270	positive regulation of cellular protein metabolic process	biological process	0.0036443
		GO:2000177	regulation of neural precursor cell proliferation	biological process	0.0038007
		GO:0016337	single organismal cell-cell adhesion	biological process	0.0038007
		GO:0043009	chordate embryonic development	biological process	0.0038007
		GO:0000271	polysaccharide biosynthetic process	biological process	0.0038548
		GO:0006915	apoptotic process	biological process	0.0038678
		GO:0012501	programmed cell death	biological process	0.0040617
		GO:0045184	establishment of protein localization	biological process	0.0041088
		GO:0014070	response to organic cyclic compound	biological process	0.0042265
		GO:0009792	embryo development ending in birth or egg hatching	biological process	0.004488
		GO:0051049	regulation of transport	biological process	0.0045045
		GO:0001704	formation of primary germ layer	biological process	0.0045851
		GO:0001944	vasculature development	biological process	0.0051955
		GO:0006629	lipid metabolic process	biological process	0.0052656
		GO:0043067	regulation of programmed cell death	biological process	0.0053057
		GO:0046847	filopodium assembly	biological process	0.0053918
		GO:0070201	regulation of establishment of protein localization	biological process	0.0054141
		GO:0034637	cellular carbohydrate biosynthetic process	biological process	0.0054238
		GO:0042981	regulation of apoptotic process	biological process	0.005558
		GO:0008610	lipid biosynthetic process	biological process	0.005558
		GO:0009103	lipopolysaccharide biosynthetic process	biological process	0.0056255
		GO:0008104	protein localization	biological process	0.0059191
		GO:0019637	organophosphate metabolic process	biological process	0.0059328
		GO:0008285	negative regulation of cell proliferation	biological process	0.0059465
		GO:0002684	positive regulation of immune system process	biological process	0.0060035
		GO:0033692	cellular polysaccharide biosynthetic process	biological process	0.0062261
		GO:0032846	positive regulation of homeostatic process	biological process	0.0062261
		GO:0006954	inflammatory response	biological process	0.0064245
		GO:0051130	positive regulation of cellular component organization	biological process	0.0064715
		GO:0044262	cellular carbohydrate metabolic process	biological process	0.0066982
		GO:0051216	cartilage development	biological process	0.0072656
		GO:0008653	lipopolysaccharide metabolic process	biological process	0.0073704
		GO:0001568	blood vessel development	biological process	0.0076873
		GO:0030162	regulation of proteolysis	biological process	0.0078985
		GO:0042176	regulation of protein catabolic process	biological process	0.0081904
		GO:1901700	response to oxygen-containing compound	biological process	0.0082926
		GO:0033554	cellular response to stress	biological process	0.0082926
		GO:0051223	regulation of protein transport	biological process	0.0082962
		GO:0001503	ossification	biological process	0.0084227
		GO:0008630	intrinsic apoptotic signaling pathway in response to DNA damage	biological process	0.0085417
		GO:0033036	macromolecule localization	biological process	0.0085417
		GO:0000122	negative regulation of transcription from RNA polymerase II promoter	biological process	0.008563
		GO:0043408	regulation of MAPK cascade	biological process	0.008698
		GO:0022603	regulation of anatomical structure morphogenesis	biological process	0.0088353
		GO:0044765	single-organism transport	biological process	0.0088353
		GO:0009607	response to biotic stimulus	biological process	0.0089552
		GO:0040011	locomotion	biological process	0.0089552
		GO:0009790	embryo development	biological process	0.0094534
		GO:0018108	peptidyl-tyrosine phosphorylation	biological process	0.0094534
		GO:0006508	proteolysis	biological process	0.0099267
		GO:0006886	intracellular protein transport	biological process	0.0099435
		GO:0043226	organelle	cellular component	1.0954e-12
		GO:0043227	membrane-bounded organelle	cellular component	2.989e-12
		GO:0031982	vesicle	cellular component	3.7355e-10
		GO:0005622	intracellular	cellular component	6.767e-10
		GO:0044424	intracellular part	cellular component	7.4779e-10
		GO:0005737	cytoplasm	cellular component	3.8248e-09
		GO:0031988	membrane-bounded vesicle	cellular component	2.0565e-08
		GO:0044421	extracellular region part	cellular component	3.0322e-08
		GO:0005576	extracellular region	cellular component	4.2862e-08
		GO:1903561	extracellular vesicle	cellular component	1.8729e-07
		GO:0043230	extracellular organelle	cellular component	1.9204e-07
		GO:0070062	extracellular exosome	cellular component	2.0358e-07
		GO:0065010	extracellular membrane-bounded organelle	cellular component	2.0888e-07
		GO:0043229	intracellular organelle	cellular component	1.0596e-06
		GO:0043231	intracellular membrane-bounded organelle	cellular component	1.5562e-06
		GO:0030054	cell junction	cellular component	1.929e-06
		GO:0070013	intracellular organelle lumen	cellular component	1.5495e-05
		GO:0043233	organelle lumen	cellular component	1.7298e-05
		GO:0031974	membrane-enclosed lumen	cellular component	2.9616e-05
		GO:0031981	nuclear lumen	cellular component	4.3056e-05
		GO:0098552	side of membrane	cellular component	0.00019289
		GO:0044464	cell part	cellular component	0.0002588
		GO:0044428	nuclear part	cellular component	0.0002703
		GO:0005623	cell	cellular component	0.00029134
		GO:0044459	plasma membrane part	cellular component	0.00041453
		GO:0030055	cell-substrate junction	cellular component	0.00050159
		GO:0031225	anchored component of membrane	cellular component	0.00059873
		GO:0044422	organelle part	cellular component	0.00086456
		GO:0005924	cell-substrate adherens junction	cellular component	0.0014482
		GO:0009897	external side of plasma membrane	cellular component	0.0017005
		GO:0005925	focal adhesion	cellular component	0.0019228
		GO:0044446	intracellular organelle part	cellular component	0.0027285
		GO:0005912	adherens junction	cellular component	0.0027708
		GO:0005654	nucleoplasm	cellular component	0.0033434
		GO:0070161	anchoring junction	cellular component	0.0038007
		GO:0046658	anchored component of plasma membrane	cellular component	0.0044845
		GO:0031362	anchored component of external side of plasma membrane	cellular component	0.00477
		GO:0031012	extracellular matrix	cellular component	0.0073485
		GO:0005515	protein binding	molecular function	1.4851e-23
		GO:0005488	binding	molecular function	4.9392e-18
		GO:0098772	molecular function regulator	molecular function	0.00016187
		GO:0016301	kinase activity	molecular function	0.00032952
		GO:0016772	transferase activity, transferring phosphorus-containing groups	molecular function	0.00041453
		GO:0016773	phosphotransferase activity, alcohol group as acceptor	molecular function	0.00097228
		GO:0004713	protein tyrosine kinase activity	molecular function	0.0022448
		GO:0000981	RNA polymerase II transcription factor activity, sequence-specific DNA binding	molecular function	0.0038007
		GO:0044877	macromolecular complex binding	molecular function	0.0038548
		GO:0030234	enzyme regulator activity	molecular function	0.0044845
		GO:0005102	receptor binding	molecular function	0.0054278
		GO:0050839	cell adhesion molecule binding	molecular function	0.0084227
		GO:0000977	RNA polymerase II regulatory region sequence-specific DNA binding	molecular function	0.0094098
		GO:0001012	RNA polymerase II regulatory region DNA binding	molecular function	0.0099851
	BI-50 vs BC-50
		GO:0048518	positive regulation of biological process	biological process	3.2157e-23
		GO:0048584	positive regulation of response to stimulus	biological process	8.1059e-19
		GO:0048583	regulation of response to stimulus	biological process	7.7631e-18
		GO:0048522	positive regulation of cellular process	biological process	4.6464e-17
		GO:0008152	metabolic process	biological process	8.8736e-17
		GO:0044710	single-organism metabolic process	biological process	1.4517e-15
		GO:0002376	immune system process	biological process	4.4369e-14
		GO:0071704	organic substance metabolic process	biological process	3.3106e-13
		GO:0044237	cellular metabolic process	biological process	1.5408e-12
		GO:0044238	primary metabolic process	biological process	1.5746e-12
		GO:0009893	positive regulation of metabolic process	biological process	2.1312e-12
		GO:0002682	regulation of immune system process	biological process	2.8807e-12
		GO:0006955	immune response	biological process	7.1262e-12
		GO:0048519	negative regulation of biological process	biological process	1.6231e-11
		GO:0010647	positive regulation of cell communication	biological process	2.333e-11
		GO:0006793	phosphorus metabolic process	biological process	7.9018e-11
		GO:0070887	cellular response to chemical stimulus	biological process	1.0548e-10
		GO:0023056	positive regulation of signaling	biological process	1.3308e-10
		GO:0009967	positive regulation of signal transduction	biological process	2.4808e-10
		GO:0048523	negative regulation of cellular process	biological process	2.5684e-10
		GO:0006796	phosphate-containing compound metabolic process	biological process	2.9503e-10
		GO:0006950	response to stress	biological process	5.4443e-10
		GO:0010646	regulation of cell communication	biological process	5.8187e-10
		GO:0002684	positive regulation of immune system process	biological process	7.0347e-10
		GO:0031325	positive regulation of cellular metabolic process	biological process	1.2564e-09
		GO:0009966	regulation of signal transduction	biological process	1.5346e-09
		GO:0051246	regulation of protein metabolic process	biological process	4.8036e-09
		GO:0010604	positive regulation of macromolecule metabolic process	biological process	5.1774e-09
		GO:0048856	anatomical structure development	biological process	5.2977e-09
		GO:0001775	cell activation	biological process	5.4066e-09
		GO:0010033	response to organic substance	biological process	6.4926e-09
		GO:0019222	regulation of metabolic process	biological process	7.038e-09
		GO:0023051	regulation of signaling	biological process	7.038e-09
		GO:0016310	phosphorylation	biological process	1.2761e-08
		GO:0044281	small molecule metabolic process	biological process	1.2761e-08
		GO:0007275	multicellular organismal development	biological process	1.6986e-08
		GO:0010562	positive regulation of phosphorus metabolic process	biological process	1.7762e-08
		GO:0045937	positive regulation of phosphate metabolic process	biological process	1.7762e-08
		GO:0030154	cell differentiation	biological process	2.3897e-08
		GO:0048731	system development	biological process	2.9749e-08
		GO:0048513	organ development	biological process	3.1692e-08
		GO:0035556	intracellular signal transduction	biological process	3.2403e-08
		GO:1902531	regulation of intracellular signal transduction	biological process	4.4075e-08
		GO:0065009	regulation of molecular function	biological process	5.0716e-08
		GO:0044767	single-organism developmental process	biological process	5.143e-08
		GO:0032502	developmental process	biological process	5.6822e-08
		GO:0050776	regulation of immune response	biological process	6.7944e-08
		GO:0042325	regulation of phosphorylation	biological process	7.4032e-08
		GO:0042327	positive regulation of phosphorylation	biological process	7.4191e-08
		GO:1902533	positive regulation of intracellular signal transduction	biological process	9.2015e-08
		GO:0045321	leukocyte activation	biological process	1.3247e-07
		GO:0051247	positive regulation of protein metabolic process	biological process	1.4345e-07
		GO:0065008	regulation of biological quality	biological process	1.4468e-07
		GO:0044711	single-organism biosynthetic process	biological process	1.5304e-07
		GO:0071310	cellular response to organic substance	biological process	2.0339e-07
		GO:0001932	regulation of protein phosphorylation	biological process	2.0672e-07
		GO:0019538	protein metabolic process	biological process	2.0764e-07
		GO:0080134	regulation of response to stress	biological process	2.1869e-07
		GO:0006915	apoptotic process	biological process	2.965e-07
		GO:0008283	cell proliferation	biological process	3.097e-07
		GO:0001934	positive regulation of protein phosphorylation	biological process	3.4433e-07
		GO:0048869	cellular developmental process	biological process	3.4433e-07
		GO:0012501	programmed cell death	biological process	3.9756e-07
		GO:0031347	regulation of defense response	biological process	3.9756e-07
		GO:0032268	regulation of cellular protein metabolic process	biological process	4.1537e-07
		GO:0031401	positive regulation of protein modification process	biological process	4.2493e-07
		GO:0051179	localization	biological process	4.3918e-07
		GO:0016337	single organismal cell-cell adhesion	biological process	4.3918e-07
		GO:0042127	regulation of cell proliferation	biological process	4.7914e-07
		GO:0043436	oxoacid metabolic process	biological process	6.0768e-07
		GO:0044255	cellular lipid metabolic process	biological process	6.4362e-07
		GO:0008219	cell death	biological process	6.4362e-07
		GO:0016265	death	biological process	6.4362e-07
		GO:0007155	cell adhesion	biological process	7.5884e-07
		GO:0022610	biological adhesion	biological process	7.6578e-07
		GO:0031399	regulation of protein modification process	biological process	1.0787e-06
		GO:0032101	regulation of response to external stimulus	biological process	1.0883e-06
		GO:0051174	regulation of phosphorus metabolic process	biological process	1.0883e-06
		GO:0006082	organic acid metabolic process	biological process	1.0883e-06
		GO:0050778	positive regulation of immune response	biological process	1.1477e-06
		GO:0019220	regulation of phosphate metabolic process	biological process	1.1477e-06
		GO:0051240	positive regulation of multicellular organismal process	biological process	1.2279e-06
		GO:0032270	positive regulation of cellular protein metabolic process	biological process	1.2279e-06
		GO:0019752	carboxylic acid metabolic process	biological process	1.4207e-06
		GO:0050790	regulation of catalytic activity	biological process	1.454e-06
		GO:0042981	regulation of apoptotic process	biological process	1.9415e-06
		GO:0043067	regulation of programmed cell death	biological process	2.3756e-06
		GO:0042592	homeostatic process	biological process	2.4353e-06
		GO:0009605	response to external stimulus	biological process	2.5728e-06
		GO:0046649	lymphocyte activation	biological process	2.5728e-06
		GO:0043170	macromolecule metabolic process	biological process	3.1044e-06
		GO:0009058	biosynthetic process	biological process	3.1044e-06
		GO:0006954	inflammatory response	biological process	3.4445e-06
		GO:0051239	regulation of multicellular organismal process	biological process	3.9441e-06
		GO:0007166	cell surface receptor signaling pathway	biological process	3.9537e-06
		GO:0006629	lipid metabolic process	biological process	3.9537e-06
		GO:0010941	regulation of cell death	biological process	3.9537e-06
		GO:0002764	immune response-regulating signaling pathway	biological process	4.0879e-06
		GO:0002253	activation of immune response	biological process	4.4295e-06
		GO:0098602	single organism cell adhesion	biological process	5.9761e-06
		GO:0040007	growth	biological process	8.0335e-06
		GO:0060341	regulation of cellular localization	biological process	8.1024e-06
		GO:0032879	regulation of localization	biological process	8.2686e-06
		GO:0006468	protein phosphorylation	biological process	8.7071e-06
		GO:0007159	leukocyte cell-cell adhesion	biological process	9.3168e-06
		GO:0060255	regulation of macromolecule metabolic process	biological process	1.0457e-05
		GO:0031323	regulation of cellular metabolic process	biological process	1.0457e-05
		GO:0030097	hemopoiesis	biological process	1.1544e-05
		GO:0032103	positive regulation of response to external stimulus	biological process	1.1694e-05
		GO:0002757	immune response-activating signal transduction	biological process	1.2081e-05
		GO:0006464	cellular protein modification process	biological process	1.7338e-05
		GO:0036211	protein modification process	biological process	1.7338e-05
		GO:0080090	regulation of primary metabolic process	biological process	1.734e-05
		GO:0048534	hematopoietic or lymphoid organ development	biological process	1.9712e-05
		GO:0043065	positive regulation of apoptotic process	biological process	2.0978e-05
		GO:0071840	cellular component organization or biogenesis	biological process	2.164e-05
		GO:1901700	response to oxygen-containing compound	biological process	2.1712e-05
		GO:0010942	positive regulation of cell death	biological process	2.4171e-05
		GO:0043068	positive regulation of programmed cell death	biological process	2.7434e-05
		GO:0009892	negative regulation of metabolic process	biological process	2.7784e-05
		GO:0002520	immune system development	biological process	3.0487e-05
		GO:0009611	response to wounding	biological process	3.0972e-05
		GO:0019637	organophosphate metabolic process	biological process	3.4235e-05
		GO:0034109	homotypic cell-cell adhesion	biological process	3.4438e-05
		GO:0002687	positive regulation of leukocyte migration	biological process	3.56e-05
		GO:0001817	regulation of cytokine production	biological process	3.6667e-05
		GO:0040011	locomotion	biological process	3.9349e-05
		GO:0006807	nitrogen compound metabolic process	biological process	4.2277e-05
		GO:1901564	organonitrogen compound metabolic process	biological process	4.8663e-05
		GO:0002690	positive regulation of leukocyte chemotaxis	biological process	5.4863e-05
		GO:0001819	positive regulation of cytokine production	biological process	5.543e-05
		GO:0044712	single-organism catabolic process	biological process	5.7124e-05
		GO:0031349	positive regulation of defense response	biological process	6.871e-05
		GO:0016043	cellular component organization	biological process	7.3817e-05
		GO:0008610	lipid biosynthetic process	biological process	8.8043e-05
		GO:0045595	regulation of cell differentiation	biological process	9.8619e-05
		GO:0070486	leukocyte aggregation	biological process	9.9905e-05
		GO:0043412	macromolecule modification	biological process	0.00011161
		GO:0002688	regulation of leukocyte chemotaxis	biological process	0.00011338
		GO:0044267	cellular protein metabolic process	biological process	0.0001306
		GO:0051128	regulation of cellular component organization	biological process	0.00013109
		GO:0071702	organic substance transport	biological process	0.00013668
		GO:0045597	positive regulation of cell differentiation	biological process	0.00013668
		GO:1901576	organic substance biosynthetic process	biological process	0.00013668
		GO:0001816	cytokine production	biological process	0.00014066
		GO:0032880	regulation of protein localization	biological process	0.00014463
		GO:0006952	defense response	biological process	0.00017414
		GO:0001701	in utero embryonic development	biological process	0.00017414
		GO:0043408	regulation of MAPK cascade	biological process	0.00020936
		GO:0070201	regulation of establishment of protein localization	biological process	0.00022728
		GO:0051234	establishment of localization	biological process	0.00023817
		GO:0044093	positive regulation of molecular function	biological process	0.00023817
		GO:0050793	regulation of developmental process	biological process	0.00025268
		GO:0051094	positive regulation of developmental process	biological process	0.00025365
		GO:0071706	tumor necrosis factor superfamily cytokine production	biological process	0.00025684
		GO:0050865	regulation of cell activation	biological process	0.00027673
		GO:0097529	myeloid leukocyte migration	biological process	0.00030207
		GO:0022407	regulation of cell-cell adhesion	biological process	0.00031822
		GO:0002685	regulation of leukocyte migration	biological process	0.00032748
		GO:0009056	catabolic process	biological process	0.00034746
		GO:0006810	transport	biological process	0.0003567
		GO:0031324	negative regulation of cellular metabolic process	biological process	0.00038272
		GO:1903555	regulation of tumor necrosis factor superfamily cytokine production	biological process	0.00042504
		GO:0060326	cell chemotaxis	biological process	0.00042504
		GO:0051641	cellular localization	biological process	0.00046631
		GO:0044092	negative regulation of molecular function	biological process	0.00053235
		GO:0097190	apoptotic signaling pathway	biological process	0.00053857
		GO:0050900	leukocyte migration	biological process	0.00054426
		GO:0048870	cell motility	biological process	0.00054893
		GO:0051674	localization of cell	biological process	0.00054893
		GO:0007249	I-kappaB kinase/NF-kappaB signaling	biological process	0.00055407
		GO:0032386	regulation of intracellular transport	biological process	0.00055407
		GO:0050921	positive regulation of chemotaxis	biological process	0.00056505
		GO:1903649	regulation of cytoplasmic transport	biological process	0.00061716
		GO:0030595	leukocyte chemotaxis	biological process	0.00061838
		GO:0030155	regulation of cell adhesion	biological process	0.0006267
		GO:0015031	protein transport	biological process	0.00062703
		GO:0048520	positive regulation of behavior	biological process	0.00062703
		GO:0002252	immune effector process	biological process	0.00064451
		GO:0044249	cellular biosynthetic process	biological process	0.00066521
		GO:0051649	establishment of localization in cell	biological process	0.00069038
		GO:0001704	formation of primary germ layer	biological process	0.00069038
		GO:0051223	regulation of protein transport	biological process	0.00069038
		GO:0002694	regulation of leukocyte activation	biological process	0.00069038
		GO:0043122	regulation of I-kappaB kinase/NF-kappaB signaling	biological process	0.00069667
		GO:0048585	negative regulation of response to stimulus	biological process	0.00070335
		GO:0031328	positive regulation of cellular biosynthetic process	biological process	0.0007166
		GO:0009891	positive regulation of biosynthetic process	biological process	0.00074465
		GO:0098609	cell-cell adhesion	biological process	0.00076952
		GO:0061448	connective tissue development	biological process	0.00077056
		GO:0045184	establishment of protein localization	biological process	0.00081006
		GO:0044260	cellular macromolecule metabolic process	biological process	0.00081112
		GO:1901360	organic cyclic compound metabolic process	biological process	0.00081112
		GO:0033036	macromolecule localization	biological process	0.00082783
		GO:0018193	peptidyl-amino acid modification	biological process	0.00083337
		GO:0000165	MAPK cascade	biological process	0.00084484
		GO:0032787	monocarboxylic acid metabolic process	biological process	0.00084484
		GO:0050727	regulation of inflammatory response	biological process	0.00086551
		GO:0043123	positive regulation of I-kappaB kinase/NF-kappaB signaling	biological process	0.00094766
		GO:1903827	regulation of cellular protein localization	biological process	0.00097647
		GO:0009792	embryo development ending in birth or egg hatching	biological process	0.0009906
		GO:0002521	leukocyte differentiation	biological process	0.0010305
		GO:0016477	cell migration	biological process	0.0010455
		GO:0008104	protein localization	biological process	0.0010455
		GO:0051049	regulation of transport	biological process	0.0010489
		GO:1903034	regulation of response to wounding	biological process	0.0010778
		GO:1901135	carbohydrate derivative metabolic process	biological process	0.0011026
		GO:0043009	chordate embryonic development	biological process	0.0011428
		GO:0019722	calcium-mediated signaling	biological process	0.0011853
		GO:0048878	chemical homeostasis	biological process	0.0011863
		GO:0042110	T cell activation	biological process	0.0012519
		GO:0070489	T cell aggregation	biological process	0.0012519
		GO:0051050	positive regulation of transport	biological process	0.001268
		GO:0010605	negative regulation of macromolecule metabolic process	biological process	0.0012978
		GO:0044699	single-organism process	biological process	0.0014008
		GO:0071593	lymphocyte aggregation	biological process	0.00142
		GO:0034641	cellular nitrogen compound metabolic process	biological process	0.0014419
		GO:0023014	signal transduction by protein phosphorylation	biological process	0.0014982
		GO:1901575	organic substance catabolic process	biological process	0.0016125
		GO:1901701	cellular response to oxygen-containing compound	biological process	0.001617
		GO:0045088	regulation of innate immune response	biological process	0.0016416
		GO:2001235	positive regulation of apoptotic signaling pathway	biological process	0.0016584
		GO:0051249	regulation of lymphocyte activation	biological process	0.0017765
		GO:0010628	positive regulation of gene expression	biological process	0.0018688
		GO:0018212	peptidyl-tyrosine modification	biological process	0.0018718
		GO:1903706	regulation of hemopoiesis	biological process	0.0018829
		GO:0032680	regulation of tumor necrosis factor production	biological process	0.0019124
		GO:2000026	regulation of multicellular organismal development	biological process	0.0019124
		GO:0051336	regulation of hydrolase activity	biological process	0.0019686
		GO:0042113	B cell activation	biological process	0.0020126
		GO:0048589	developmental growth	biological process	0.0021779
		GO:0050852	T cell receptor signaling pathway	biological process	0.0022848
		GO:0050867	positive regulation of cell activation	biological process	0.0022848
		GO:0043410	positive regulation of MAPK cascade	biological process	0.0022869
		GO:0002218	activation of innate immune response	biological process	0.0022919
		GO:0048646	anatomical structure formation involved in morphogenesis	biological process	0.0023449
		GO:0045785	positive regulation of cell adhesion	biological process	0.0025359
		GO:0018108	peptidyl-tyrosine phosphorylation	biological process	0.0025359
		GO:0032640	tumor necrosis factor production	biological process	0.0025371
		GO:0006897	endocytosis	biological process	0.0026277
		GO:0010557	positive regulation of macromolecule biosynthetic process	biological process	0.002784
		GO:0044248	cellular catabolic process	biological process	0.0028262
		GO:0009653	anatomical structure morphogenesis	biological process	0.0033076
		GO:0009888	tissue development	biological process	0.0033243
		GO:1902105	regulation of leukocyte differentiation	biological process	0.0034306
		GO:0043085	positive regulation of catalytic activity	biological process	0.0034336
		GO:1903037	regulation of leukocyte cell-cell adhesion	biological process	0.0035125
		GO:0008285	negative regulation of cell proliferation	biological process	0.0036422
		GO:0032844	regulation of homeostatic process	biological process	0.0037422
		GO:0055114	oxidation-reduction process	biological process	0.003746
		GO:0002683	negative regulation of immune system process	biological process	0.003746
		GO:0045089	positive regulation of innate immune response	biological process	0.003746
		GO:1903708	positive regulation of hemopoiesis	biological process	0.003746
		GO:0051173	positive regulation of nitrogen compound metabolic process	biological process	0.0037638
		GO:0032845	negative regulation of homeostatic process	biological process	0.0037638
		GO:0050851	antigen receptor-mediated signaling pathway	biological process	0.0041629
		GO:0046483	heterocycle metabolic process	biological process	0.0041629
		GO:0019725	cellular homeostasis	biological process	0.0041711
		GO:0006520	cellular amino acid metabolic process	biological process	0.0042139
		GO:0002758	innate immune response-activating signal transduction	biological process	0.0043033
		GO:0034405	response to fluid shear stress	biological process	0.0043086
		GO:0009719	response to endogenous stimulus	biological process	0.0047253
		GO:0006725	cellular aromatic compound metabolic process	biological process	0.0047338
		GO:0055082	cellular chemical homeostasis	biological process	0.0048385
		GO:0006508	proteolysis	biological process	0.004999
		GO:0002697	regulation of immune effector process	biological process	0.0050333
		GO:0009607	response to biotic stimulus	biological process	0.0050538
		GO:1901605	alpha-amino acid metabolic process	biological process	0.0054032
		GO:2000145	regulation of cell motility	biological process	0.0054032
		GO:0016192	vesicle-mediated transport	biological process	0.0055129
		GO:0016053	organic acid biosynthetic process	biological process	0.0057108
		GO:0046394	carboxylic acid biosynthetic process	biological process	0.0057108
		GO:0040012	regulation of locomotion	biological process	0.0058623
		GO:0046907	intracellular transport	biological process	0.0059849
		GO:0010629	negative regulation of gene expression	biological process	0.0061903
		GO:1900180	regulation of protein localization to nucleus	biological process	0.0061903
		GO:0001944	vasculature development	biological process	0.0063063
		GO:0032388	positive regulation of intracellular transport	biological process	0.0064092
		GO:0045621	positive regulation of lymphocyte differentiation	biological process	0.0064092
		GO:0002696	positive regulation of leukocyte activation	biological process	0.0065227
		GO:0033993	response to lipid	biological process	0.0067645
		GO:2001233	regulation of apoptotic signaling pathway	biological process	0.0068172
		GO:1902107	positive regulation of leukocyte differentiation	biological process	0.0068713
		GO:0032675	regulation of interleukin-6 production	biological process	0.0068713
		GO:0032637	interleukin-8 production	biological process	0.0068713
		GO:0019932	second-messenger-mediated signaling	biological process	0.0069862
		GO:0034097	response to cytokine	biological process	0.0069862
		GO:0030162	regulation of proteolysis	biological process	0.0074862
		GO:0001568	blood vessel development	biological process	0.0074862
		GO:0071345	cellular response to cytokine stimulus	biological process	0.0075745
		GO:0032677	regulation of interleukin-8 production	biological process	0.0080217
		GO:0016054	organic acid catabolic process	biological process	0.0080551
		GO:0046395	carboxylic acid catabolic process	biological process	0.0080551
		GO:0033157	regulation of intracellular protein transport	biological process	0.0080671
		GO:0032715	negative regulation of interleukin-6 production	biological process	0.0081421
		GO:0072593	reactive oxygen species metabolic process	biological process	0.0081839
		GO:0044283	small molecule biosynthetic process	biological process	0.0083803
		GO:0022603	regulation of anatomical structure morphogenesis	biological process	0.0085664
		GO:0045893	positive regulation of transcription, DNA-templated	biological process	0.0091296
		GO:1903508	positive regulation of nucleic acid-templated transcription	biological process	0.0091296
		GO:0002443	leukocyte mediated immunity	biological process	0.0095705
		GO:0045935	positive regulation of nucleobase-containing compound metabolic process	biological process	0.0099136
		GO:0043227	membrane-bounded organelle	cellular component	3.4216e-24
		GO:0043226	organelle	cellular component	3.2157e-23
		GO:0044424	intracellular part	cellular component	2.9031e-19
		GO:0005737	cytoplasm	cellular component	2.9031e-19
		GO:0005622	intracellular	cellular component	4.4765e-19
		GO:0031982	vesicle	cellular component	2.2015e-15
		GO:0005576	extracellular region	cellular component	8.3018e-15
		GO:0044421	extracellular region part	cellular component	5.1121e-14
		GO:0043231	intracellular membrane-bounded organelle	cellular component	1.2113e-13
		GO:0043229	intracellular organelle	cellular component	2.0583e-13
		GO:0031988	membrane-bounded vesicle	cellular component	2.868e-13
		GO:1903561	extracellular vesicle	cellular component	3.2541e-13
		GO:0043230	extracellular organelle	cellular component	3.3106e-13
		GO:0070062	extracellular exosome	cellular component	3.3659e-13
		GO:0065010	extracellular membrane-bounded organelle	cellular component	3.5588e-13
		GO:0044444	cytoplasmic part	cellular component	1.8623e-11
		GO:0005739	mitochondrion	cellular component	1.5087e-09
		GO:0005623	cell	cellular component	1.1477e-06
		GO:0044464	cell part	cellular component	1.6495e-06
		GO:0044422	organelle part	cellular component	2.5892e-06
		GO:0044446	intracellular organelle part	cellular component	1.14e-05
		GO:0009897	external side of plasma membrane	cellular component	3.6667e-05
		GO:0044459	plasma membrane part	cellular component	9.4761e-05
		GO:0005615	extracellular space	cellular component	0.00021903
		GO:0098552	side of membrane	cellular component	0.00030206
		GO:0030054	cell junction	cellular component	0.00072628
		GO:0031090	organelle membrane	cellular component	0.000993
		GO:0005575	cellular_component	cellular component	0.0010288
		GO:0031974	membrane-enclosed lumen	cellular component	0.0017451
		GO:0098805	whole membrane	cellular component	0.0019349
		GO:0070013	intracellular organelle lumen	cellular component	0.0021039
		GO:0043233	organelle lumen	cellular component	0.0023531
		GO:0044429	mitochondrial part	cellular component	0.0030244
		GO:0005634	nucleus	cellular component	0.0047707
		GO:0009986	cell surface	cellular component	0.0065981
		GO:0005829	cytosol	cellular component	0.0065981
		GO:0005740	mitochondrial envelope	cellular component	0.0096653
		GO:0098588	bounding membrane of organelle	cellular component	0.0096653
		GO:0005515	protein binding	molecular function	1.4391e-33
		GO:0005488	binding	molecular function	4.0409e-30
		GO:0003824	catalytic activity	molecular function	1.2996e-08
		GO:0005102	receptor binding	molecular function	2.1391e-06
		GO:0098772	molecular function regulator	molecular function	6.6066e-06
		GO:0030234	enzyme regulator activity	molecular function	0.00012468
		GO:0005539	glycosaminoglycan binding	molecular function	0.0001989
		GO:0031406	carboxylic acid binding	molecular function	0.00025268
		GO:0043177	organic acid binding	molecular function	0.00025268
		GO:0030246	carbohydrate binding	molecular function	0.00055209
		GO:0042802	identical protein binding	molecular function	0.00069836
		GO:0016772	transferase activity, transferring phosphorus-containing groups	molecular function	0.0012046
		GO:0016740	transferase activity	molecular function	0.0018688
		GO:0005178	integrin binding	molecular function	0.001949
		GO:0043168	anion binding	molecular function	0.0026277
		GO:0016301	kinase activity	molecular function	0.0039796
		GO:0044877	macromolecular complex binding	molecular function	0.0099238
